# Supplementary material for: Association of dietary phytochemical index with cardiometabolic risk factors
Source: Atypon-hosted journal article supplement (doi:10.1024/0300-9831/a000763), 2022-08-23
Supplement: 0300-9831_a000763_esm1.pdf [file 0300-9831_a000763_esm1.pdf]

## Electronic supplementary material

**Table E1.** The quality assessment of the included studies by Newcastle–Ottawa scale

| Quality assessment of cross-sectional studies |      |                 |                  |                             |              |
|-----------------------------------------------|------|-----------------|------------------|-----------------------------|--------------|
| Study first author                            | Year | Selection*****a | Comparability**b | Assessment of exposure***c  | Risk of Bias |
| S. Delshad Aghdam                             | 2021 | ****            | **               | ***                         | Low          |
| F. Dehghani Firouzabadi                       | 2021 | ****            | **               | ***                         | Low          |
| R. Sadat Ziaee                                | 2021 | **              | **               | ***                         | Medium       |
| E. Asgari                                     | 2021 | ****            | **               | ***                         | Low          |
| M. Kim                                        | 2020 | ****            | **               | ***                         | Low          |
| O. Eslami                                     | 2020 | **              | **               | ***                         | Medium       |
| Z. Bahadoran                                  | 2013 | **              | **               | ***                         | Medium       |
| H. K. Vincent                                 | 2010 | *               | *                | **                          | High         |
| Quality assessment of Case-control studies    |      |                 |                  |                             |              |
| Study first author                            | Year | Selection****d  | Comparability**e | Assessment of exposure****f | Risk of Bias |
| M. Abshirini                                  | 2018 | **              | **               | ***                         | Medium       |
| Quality assessment of Cohort studies          |      |                 |                  |                             |              |
| Study first author                            | Year | Selection****g  | Comparability**h | Assessment of outcome****i  | Risk of Bias |
| F. Azizi-Soleiman                             | 2020 | ***             | **               | ***                         | Low          |
| J Im                                          | 2020 | **              | **               | ***                         | Medium       |
| M. Golzarand                                  | 2015 | **              | **               | ***                         | Medium       |
| Z. Bahadoran                                  | 2015 | ***             | **               | ***                         | Low          |
| M. Golzarand                                  | 2014 | ***             | **               | ***                         | Low          |
| A .Mottaghi                                   | 2015 | ***             | **               | ***                         | Low          |
| P.Mirmiran                                    | 2012 | ***             | **               | ***                         | Low          |

a : Representativeness of the sample (\*) Sample size (\*) Non-respondents (\*) Ascertainment of the exposure (risk factor) (\*\*)

b : The subjects in different outcome groups are comparable, based on the study design or analysis. Confounding factors are controlled (\*\*)

c : Assessment of the outcome (\*\*) Statistical test (\*)

d : Is the case definition adequate? (\*) Representativeness of the cases (\*) Selection of Controls (\*) Definition of Controls (\*)

e : Comparability of cases and controls on the basis of the design or analysis (\*\*)

f : Ascertainment of exposure (\*) Same method of ascertainment for cases and controls (\*) Non-Response rate (\*)

g: Representativeness of the exposed cohort (\*) Selection of the non-exposed cohort (\*) Ascertainment of exposure (\*) Demonstration that outcome of interest was not present at start of study (\*)

h: Comparability of cohorts on the basis of the design or analysis (\*\*)

i : Assessment of outcome (\*) Was follow-up long enough for outcomes to occur (\*) Adequacy of follow up of cohorts (\*)
